# Supplementary material for: A novel synthesis protocol for Co3O4 nanocatalysts and their catalytic applications
Source: Royal Society of Chemistry journal article supplement (doi:10.1039/c7ra06996k), 2017-01-01
Supplement: c7ra06996k1.pdf [file c7ra06996k1.pdf]

Supporting information

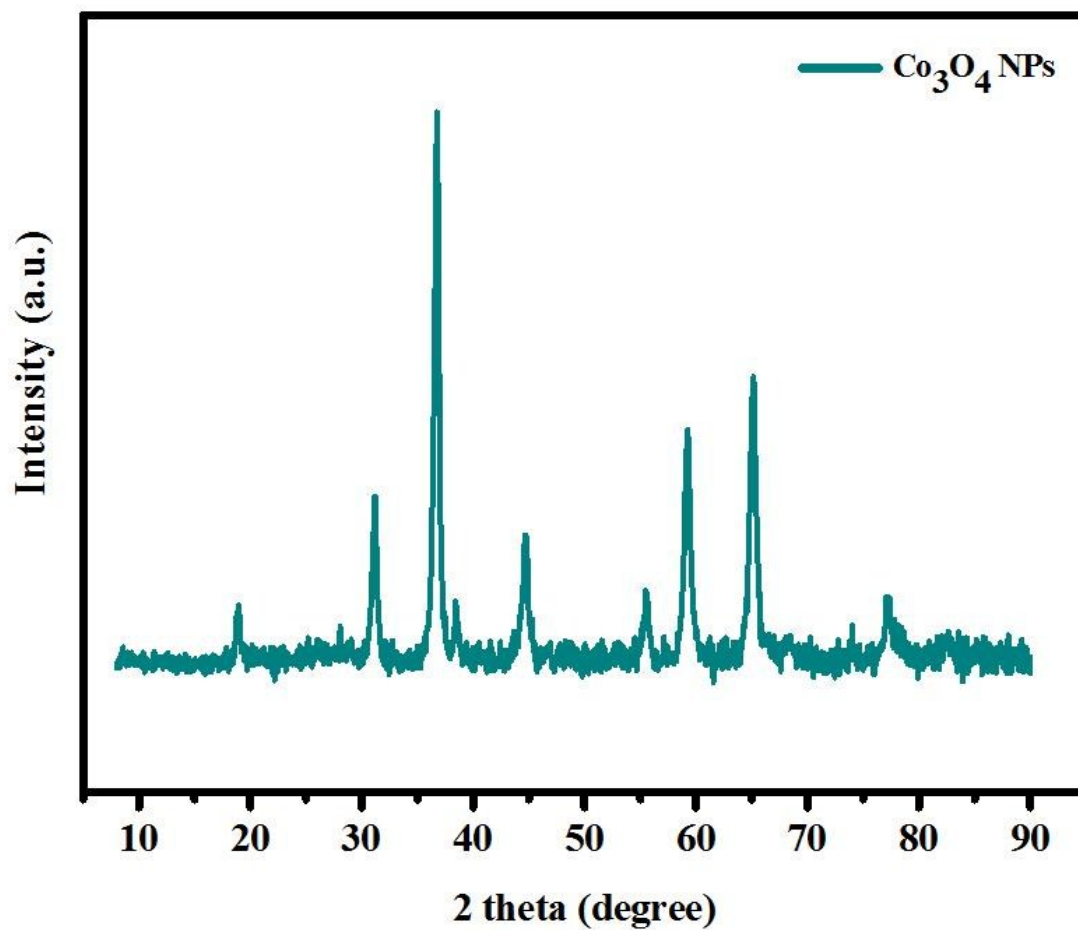

Fig. S1

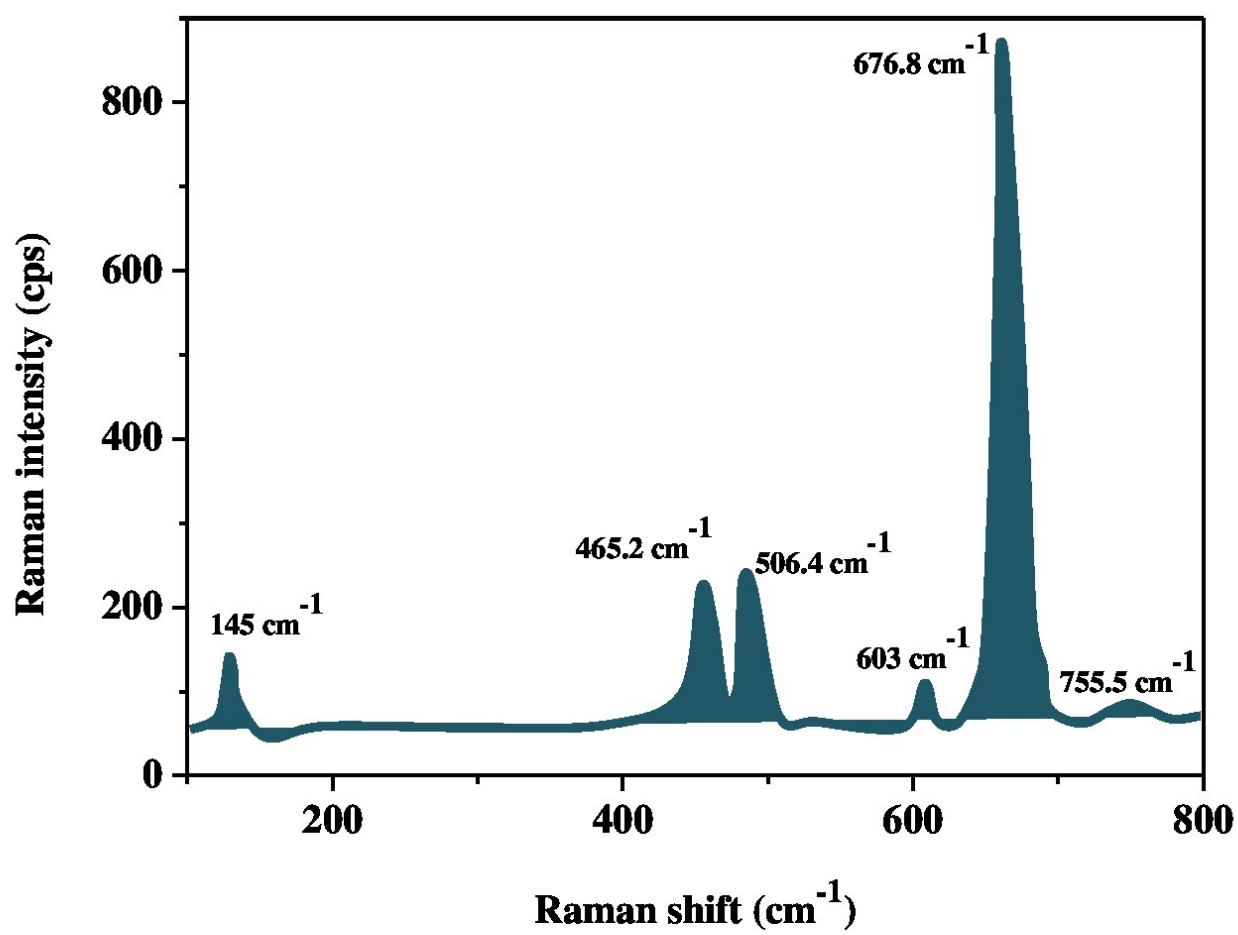

Fig. S2

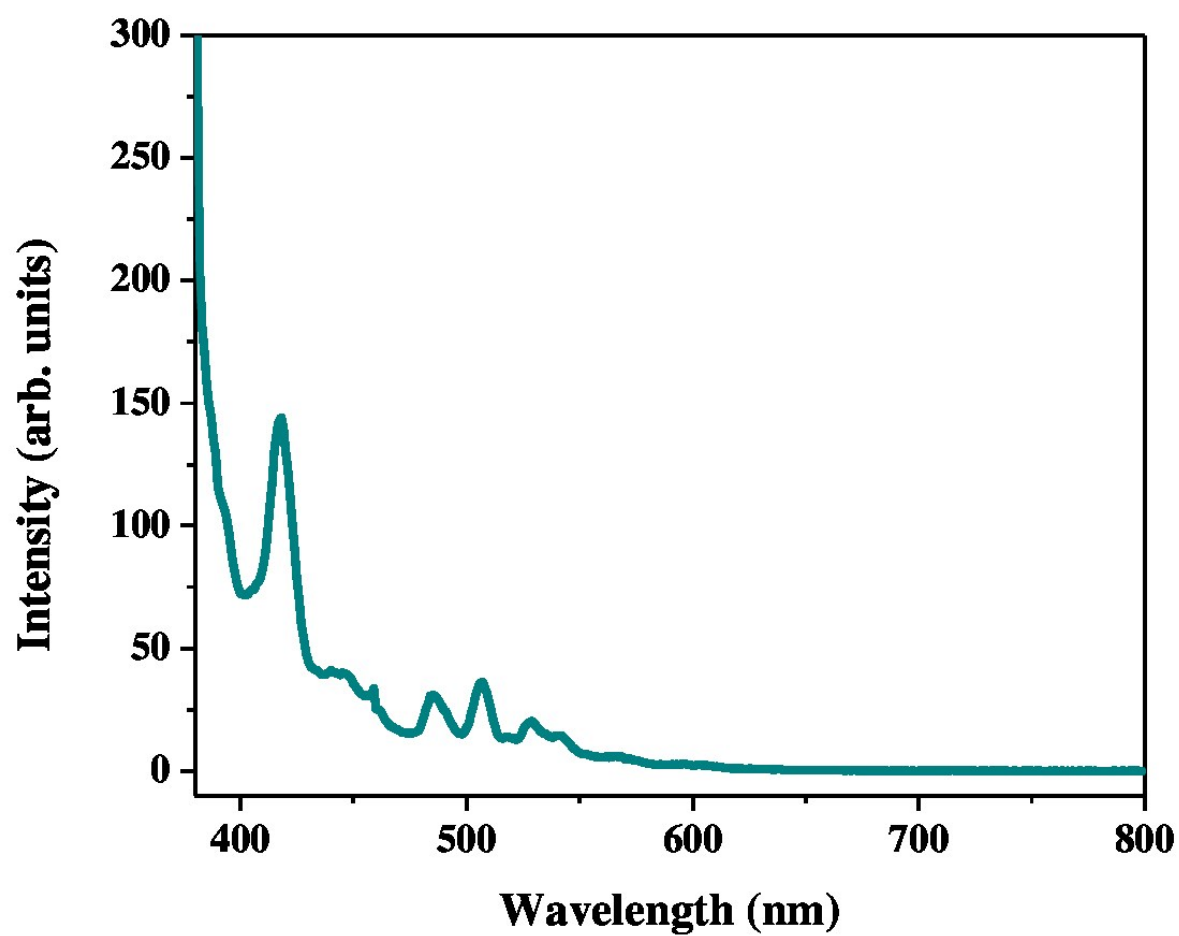

Fig. S3

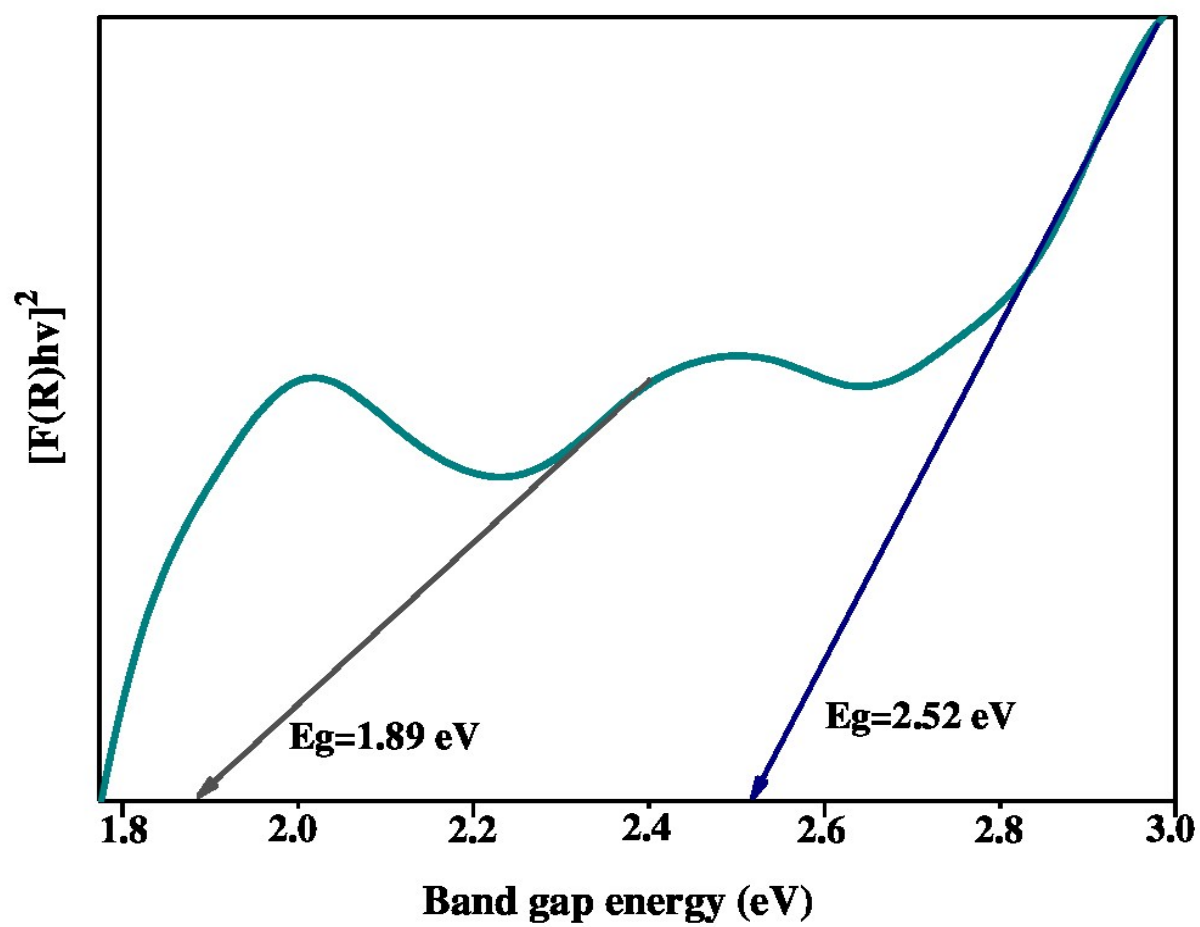

Fig. S4

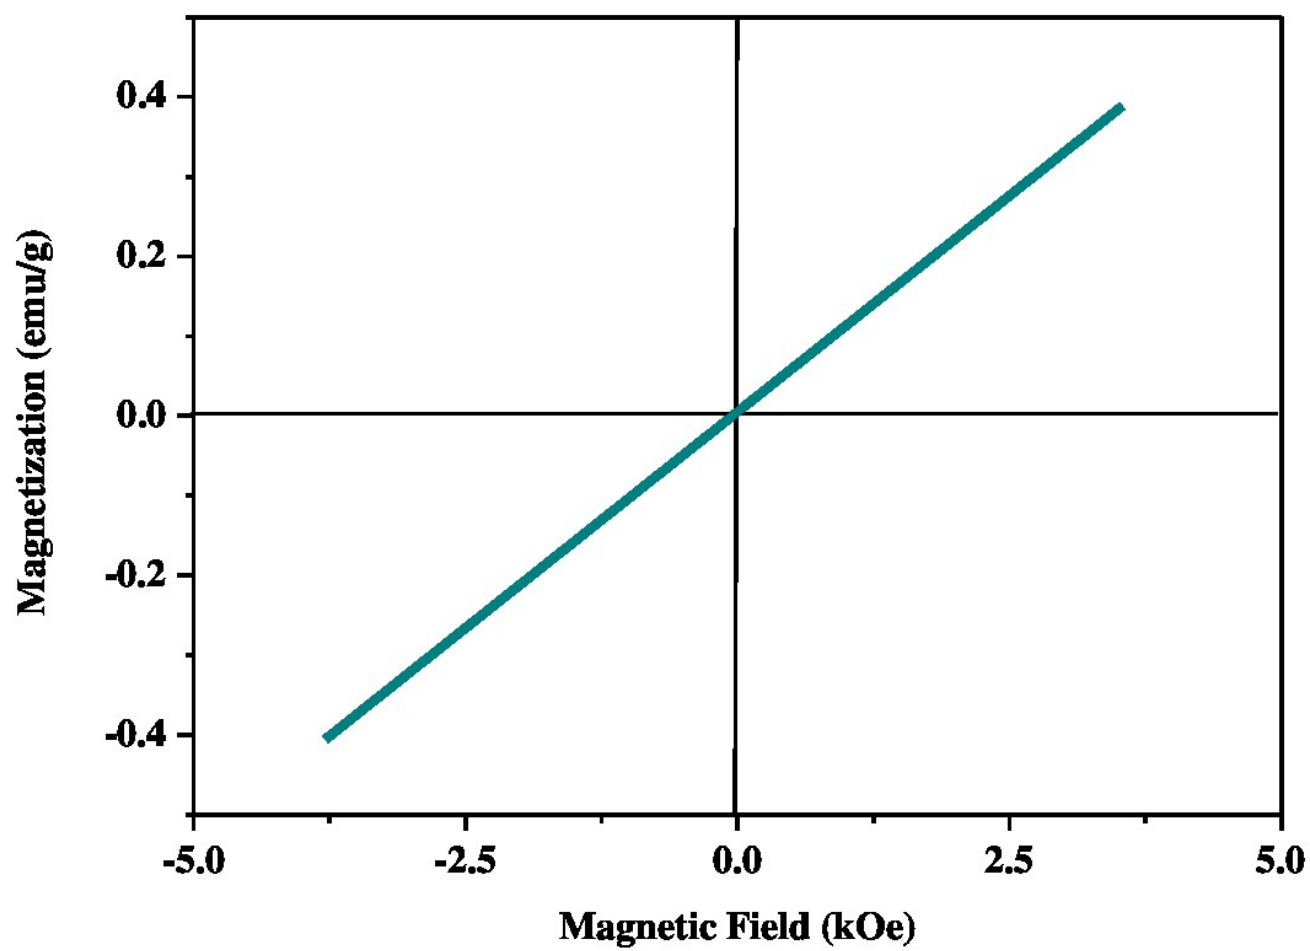

Fig. S5

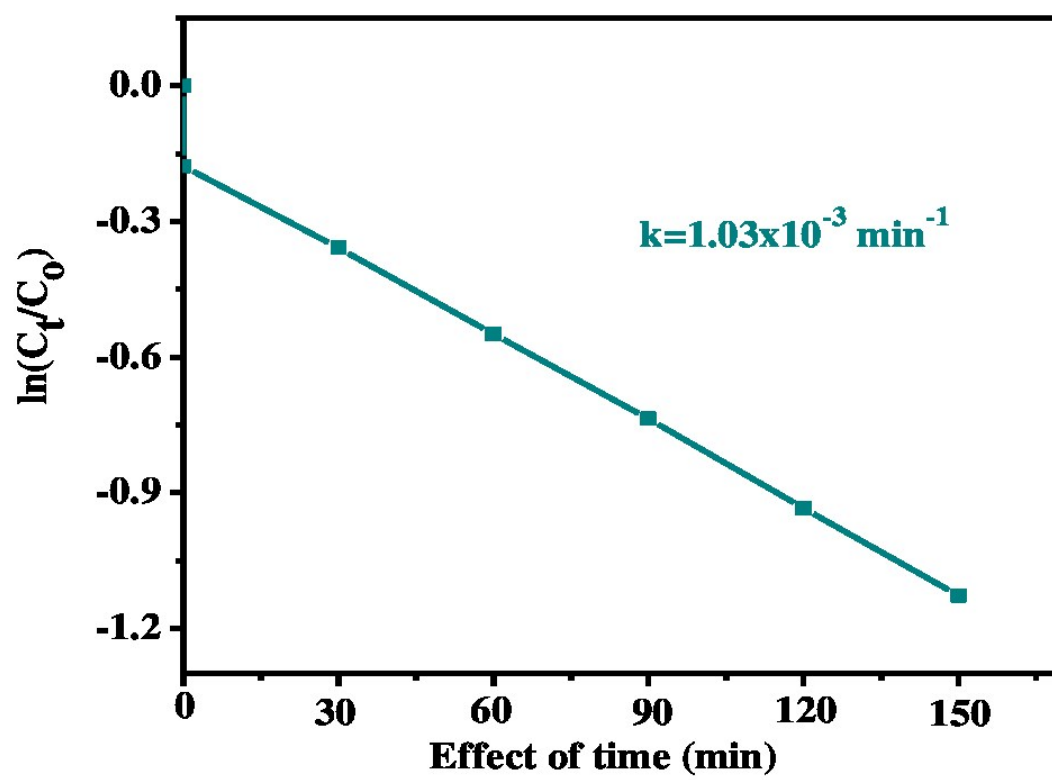

Fig. S6

**Fig. S1.** X-ray diffraction (XRD) pattern of  $\text{Co}_3\text{O}_4$ -NPs.

**Fig. S2.** Raman spectrum of  $\text{Co}_3\text{O}_4$ -NPs.

**Fig. S3.** Photoluminescence spectra of  $\text{Co}_3\text{O}_4$ -NPs at room temperature.

**Fig. S4.** UV-Visible diffuse reflectance spectra of  $\text{Co}_3\text{O}_4$ -NPs.

**Fig. S5.** Magnetic hysteresis loops of  $\text{Co}_3\text{O}_4$ -NPs.

**Fig. S6.** Kinetic plots of  $\ln (C_t/C_0)$  versus reaction time (t, mins) on the PCD of TDW in the presence of  $\text{Co}_3\text{O}_4$ -NPs.
